# Supplementary material for: Structure of the O‐Antigen and the Lipid A from the Lipopolysaccharide of Fusobacterium nucleatum ATCC 51191
Source: PubMed Central journal article supplement (PMC8048906; doi:10.1002/cbic.202000751), 2020-12-14
Supplement: CBIC-22-1252-s001.pdf [file CBIC-22-1252-s001.pdf]

# ChemBioChem

Supporting Information

## Structure of the O-Antigen and the Lipid A from the Lipopolysaccharide of *Fusobacterium nucleatum* ATCC 51191

Pilar Garcia-Vello, Flaviana Di Lorenzo, Dimitra Lamprinaki, Anna Notaro, Immacolata Speciale, Antonio Molinaro, Nathalie Juge, and Cristina De Castro\*

## **Author Contributions**

P.G.-V. Formal analysis:Lead; Investigation:Lead; Writing – original draft:Lead

F.D. Investigation:Equal; Writing – original draft:Equal

D.L. Resources:Supporting

A.N. Investigation:Supporting

I.S. Investigation:Supporting

A.M. Conceptualization:Supporting; Investigation:Supporting; Supervision:Supporting; Writing – review & editing:-  
Supporting

N.J. Resources:Supporting; Writing – review & editing:Supporting

C.D. Conceptualization:Lead; Investigation:Lead; Supervision:Lead; Writing – review & editing:Lead

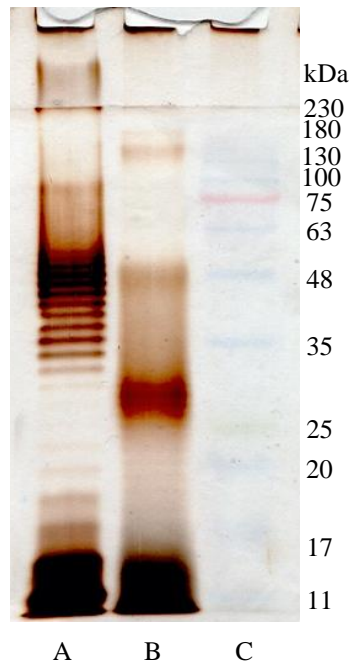

**Figure S1.** Electrophoresis analysis of bacterial LPS. **A.** *E. coli* O111:B4 LPS (8 µg). **B.** *F. nucleatum* ATCC 51191 LPS (8 µg) **C.** BlueEye protein standard. The samples were run on a 12 % SDS-PAGE and visualized by silver staining.

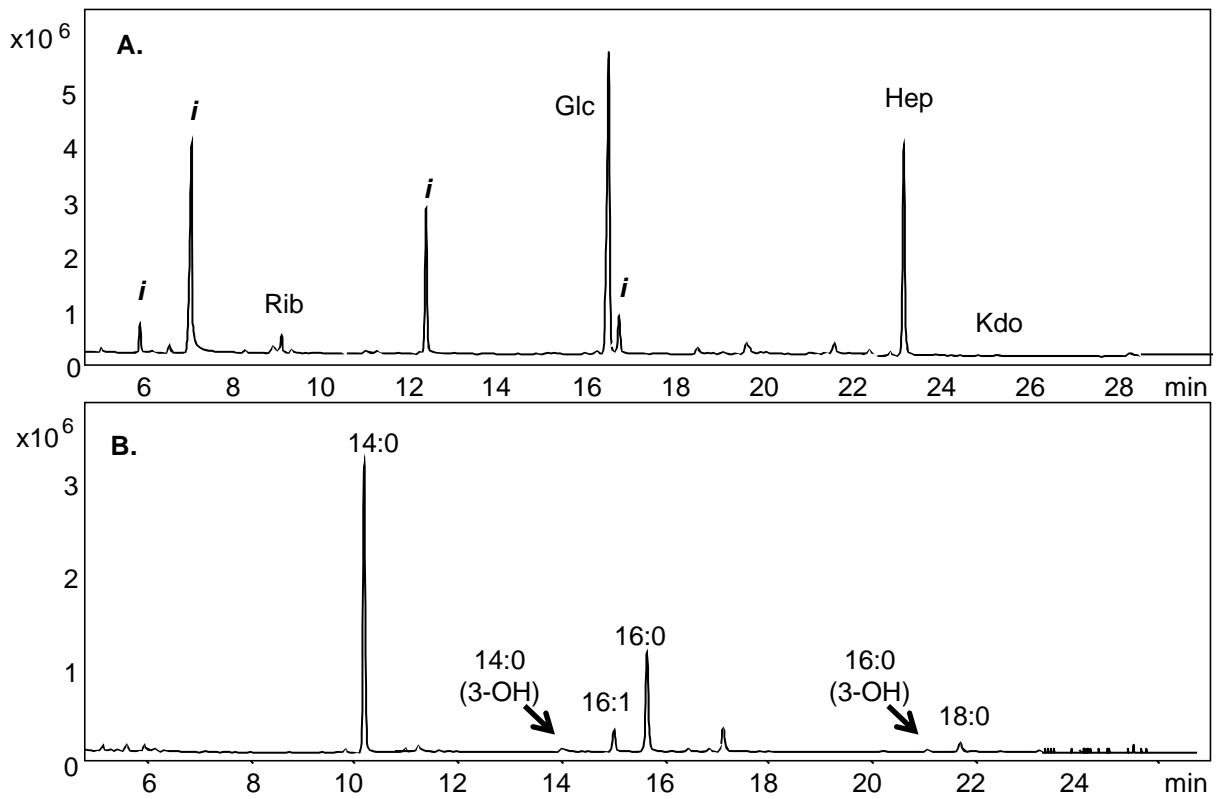

**Figure S2.** GC-MS profile of *F. nucleatum* ATCC 51191 LPS **A.** acetylated methyl glycosides, **B.** lipid compositional analysis. I: impurities; 16:1 and 18:0 are impurities or cell derived fatty acids.

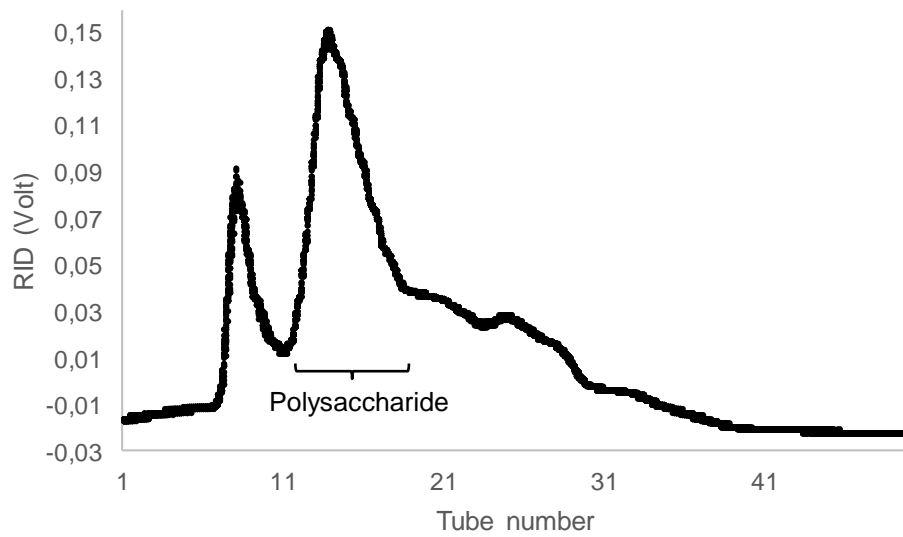

**Figure S3:** Chromatogram profile of *F. nucleatum* ATCC 51191 O-antigen purification on a Sephacryl S200 column. The O-antigen corresponds to the second (highest) peak of the chromatogram.

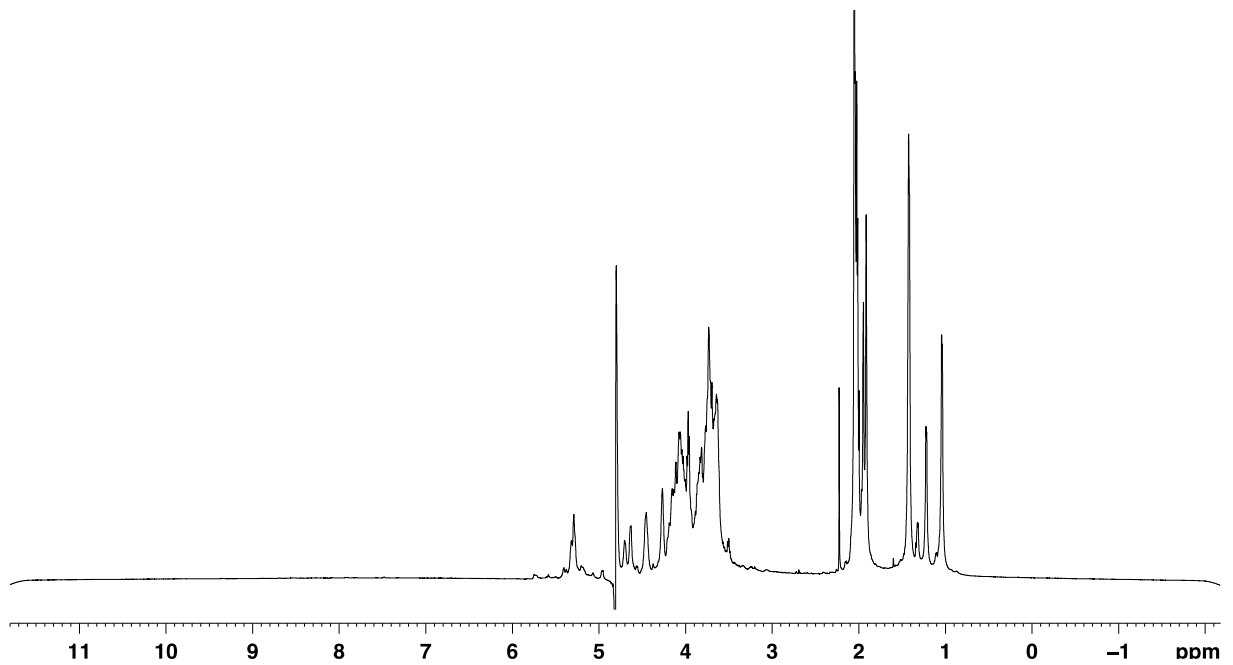

**Figure S4:** <sup>1</sup>H NMR spectrum of the O-antigen of *F. nucleatum* ATCC 51191 showing the lack of signals around 8 ppm and therefore the absence of a formyl group (600 MHz, 25 °C, 550 μL of D<sub>2</sub>O, neutral pH).

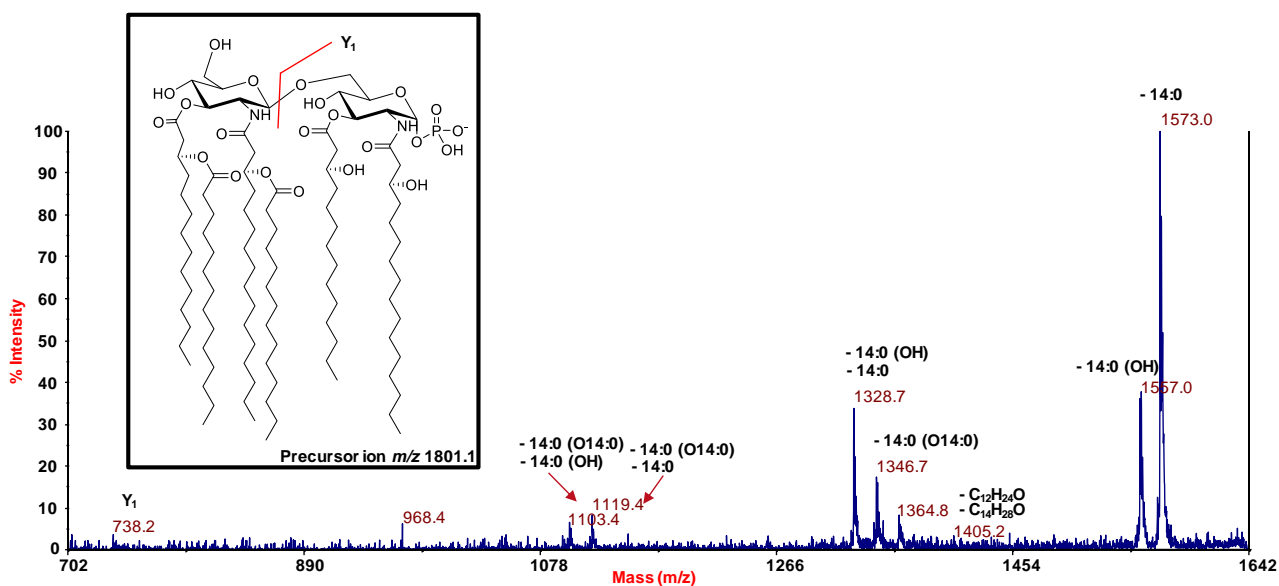

**Figure S5.** Negative-ion MALDI MS/MS spectrum of precursor ion at  $m/z$  1801.1 of the lipid A of *F. nucleatum* ATCC 51191. This is a representative ion peak of the cluster ascribed to hexa-acylated lipid A species decorated by two phosphates. The main fragments' assignment is indicated in the spectrum. The proposed structure is reported in the inset. The loss of  $C_{12}H_{24}O$  (184 mass units) and  $C_{14}H_{28}O$  (212 mass units) is also indicated and was due to a rearrangement typically occurring on primary acyl chains only when their 3-OH group is free, thus contributing to the establishment of the location of the secondary acyl substitution.

**Table S1.** The main MALDI-TOF MS ion peaks *F. nucleatum* ATCC 51191 lipid A. The table reports the predicted mass and the proposed interpretation of the substituting fatty acids and phosphates on the *F. nucleatum* ATCC 51191 lipid A backbone. See Figure 6 for full spectrum.

| Predicted mass (Da) | Observed ion peaks ( $m/z$ ) | Acyl substitution | Proposed fatty acid/phosphate composition                                                                |
|---------------------|------------------------------|-------------------|----------------------------------------------------------------------------------------------------------|
| 1364.96             | 1364.68                      | Tetra-acyl        | HexN <sub>2</sub> P [14:0(3-OH)] [16:0(3-OH)] <sub>2</sub> (14:0)                                        |
| 1444.92             | 1444.69                      | Tetra-acyl        | HexN <sub>2</sub> P <sub>2</sub> [14:0(3-OH)] [16:0(3-OH)] <sub>2</sub> (14:0)                           |
| 1591.15             | 1590.86                      | Penta-acyl        | HexN <sub>2</sub> P [14:0(3-OH)] <sub>2</sub> [16:0(3-OH)] <sub>2</sub> (14:0)                           |
| 1671.11             | 1670.87                      | Penta-acyl        | HexN <sub>2</sub> P <sub>2</sub> [14:0(3-OH)] <sub>2</sub> [16:0(3-OH)] <sub>2</sub> (14:0)              |
| 1801.35             | 1801.15                      | Hexa-acyl         | HexN <sub>2</sub> P [14:0(3-OH)] <sub>2</sub> [16:0(3-OH)] <sub>2</sub> (14:0) <sub>2</sub>              |
| 1881.31             | 1881.15                      | Hexa-acyl         | HexN <sub>2</sub> P <sub>2</sub> [14:0(3-OH)] <sub>2</sub> [16:0(3-OH)] <sub>2</sub> (14:0) <sub>2</sub> |
